# Supplementary material
Source: PubMed Central journal article supplement (PMC3669166)

## **Supplemental Material to:**

**Susan Lapthorne, Prue M. Pereira-Fantini, Guineva Wilson,  
Sarah L. Thomas, Nicole L. Dellios, Michelle Scurr, Orla  
O'Sullivan, Fiona Fouhy, R. Paul Ross, Catherine Stanton,  
Gerald F. Fitzgerald, Paul D. Cotter and Julie E. Bines**

**Gut microbial diversity is reduced and is associated with  
colonic inflammation in a piglet model of short bowel  
syndrome**

**Gut Microbes 2013; 4(3)**

**<http://dx.doi.org/10.4161/gmic.24372>**

**[http://www.landesbioscience.com/journals/gutmicrobes/  
article/24372](http://www.landesbioscience.com/journals/gutmicrobes/article/24372)**

Supplementary table 1: List of primer sequences and Universal ProbeLibrary probe combinations used in this study.

| <b>Primer</b> | <b>Sequence 5' to 3'</b>  | <b>UPL Probe</b> |
|---------------|---------------------------|------------------|
| RPL32 Forward | aactggccatcagggtcac       | #64              |
| RPL32 Reverse | cacaactggaactcctgtctattc  |                  |
| IL1B Forward  | ccaattcagggacctacc        | #19              |
| IL1B Reverse  | catggctgcttcagaaacct      |                  |
| IL8 Forward   | ttcttctttatcccaaactgg     | #41              |
| IL8 Reverse   | ccacatgtcctcaaggtagga     |                  |
| IL18 Forward  | acttactttgtagctgaaaacgatg | #85              |
| IL18 Reverse  | tttaggttcaagcttgccaaa     |                  |
| TNF Forward   | ttgtcgctacatcgctgaac      | #32              |
| TNF Reverse   | ccagtagggcggttacagac      |                  |

Figure S1. Rarefaction curve and principle component analysis of samples sequenced by high-throughput DNA sequencing. **(A)** Rarefaction curves for each group at 97% similarity indicated that the total bacterial diversity present was well represented. Number of operational taxonomic units (OTUs) identified as a function of the number of sequence tags sampled. **(B)** Principle component analysis revealed that the small bowel resection (SBR) groups at week 2 and week 6 clustered together, and were distinct from the non-operation control (NOC) and sham groups.

**A**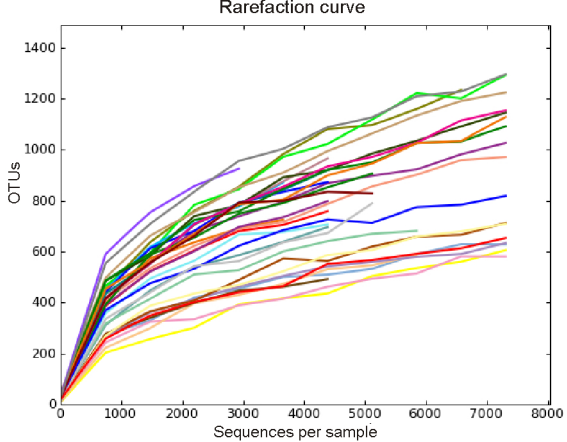**B**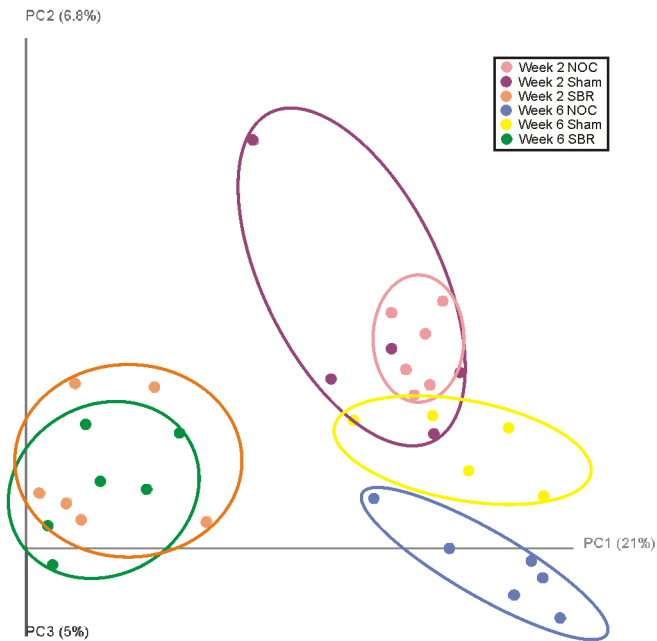

Supplement: gmic-4-212-s01.pdf [file gmic-4-212-s01.pdf]
